# Supplementary material
Source: HighWire-hosted journal article supplement (https://tsaco.bmj.com/content/3/1/e000196)
Supplement: inline-supplementary-material-1 [file inline-supplementary-material-1.docx]

| State | Year | Males | Hispanic | White | Black | Other |
| --- | --- | --- | --- | --- | --- | --- |
| California | 2009 | 50.1% | 37.0% | 77.7% | 7.1% | 15.2% |
|  | 2010 | 49.7% | 37.6% | 75.9% | 7.3% | 16.8% |
|  | 2011 | 49.7% | 38.0% | 75.7% | 7.3% | 17.0% |
|  | 2012 | 49.7% | 38.2% | 75.5% | 7.3% | 17.2% |
|  | 2013 | 49.7% | 38.4% | 75.3% | 7.2% | 17.4% |
|  | 2014 | 49.7% | 38.6% | 75.0% | 7.2% | 17.7% |
| Control States* | 2009 | 49.3% | 13.2% | 81.3% | 13.3% | 5.5% |
|  | 2010 | 49.1% | 13.6% | 80.4% | 13.5% | 6.1% |
|  | 2011 | 49.1% | 13.9% | 80.2% | 13.6% | 6.2% |
|  | 2012 | 49.1% | 14.1% | 80.0% | 13.7% | 6.3% |
|  | 2013 | 49.1% | 14.2% | 79.8% | 13.7% | 6.5% |
|  | 2014 | 49.2% | 14.5% | 79.5% | 13.8% | 6.7% |

eTable1: Demographic distribution of total population in California versus Control States

*data for combined statistics for Arizona, Florida, Illinois, Michigan, Minnesota, New York, North Carolina, Oregon, Virginia

eTable2: Difference in Difference Model Coefficients for crude and age-adjusted fatality rates

| Crude Rates | Coefficient | Standard Error | p-value | 95% Confidence Interval | |
| --- | --- | --- | --- | --- | --- |
| Overall Fatalities |  |  |  |  |  |
| time | 0.267779 | 0.193005 | 0.165 | -.1105044 | .6460615 |
| treated | 5.02273 | 2.281707 | 0.028 | .5506666 | 9.494793 |
| DID | -0.59262 | 0.16924 | 0.000 | -.9243225 | -.2609126 |
| bradycat | 1.934689 | 0.409236 | 0.000 | 1.132602 | 2.736777 |
| males | -157.011 | 99.62447 | 0.115 | -352.2709 | 3o0w8.24982 |
| hispanic | -4.28769 | 7.385374 | 0.562 | -18.76276 | 10.18737 |
| white | 8.608405 | 25.52244 | 0.736 | -41.41466 | 58.63147 |
| black | -2.8068 | 25.91578 | 0.914 | -53.60079 | 47.98719 |
|  |  |  |  |  |  |
| Fatalities (excluding unknown intent and police related) |  |  |  |  |  |
| time | .2258715 | .1892231 | 0.233 | -0.145 | 0.596742 |
| treated | 3.803306 | 2.394505 | 0.112 | -0.88984 | 8.49645 |
| DID | -.5430481 | .1434529 | 0.000 | -0.82421 | -0.26189 |
| bradycat | 1.812174 | .3289784 | 0.000 | 1.167388 | 2.456959 |
| males | -89.32259 | 80.99993 | 0.270 | -248.08 | 69.43436 |
| hispanic | -1.049973 | 6.379471 | 0.869 | -13.5535 | 11.45356 |
| white | 8.709159 | 22.69171 | 0.701 | -35.7658 | 53.1841 |
| black | 2.735225 | 21.2083 | 0.897 | -38.8323 | 44.30273 |
|  |  |  |  |  |  |
| Age adjusted Rates |  |  |  |  |  |
| Overall Fatalities |  |  |  |  |  |
| time | 0.172942 | 0.190448 | 0.364 | -0.20033 | 0.546212 |
| treated | 4.959124 | 2.368518 | 0.036 | 0.316913 | 9.601335 |
| DID | -0.48956 | 0.162555 | 0.003 | -0.80816 | -0.17096 |
| bradycat | 1.854964 | 0.415352 | 0.000 | 1.04089 | 2.669039 |
| males | -132.514 | 101.1764 | 0.190 | -330.816 | 65.78864 |
| hispanic | -4.86558 | 7.854857 | 0.536 | -20.2608 | 10.52966 |
| white | 8.658829 | 26.15636 | 0.741 | -42.6067 | 59.92435 |
| black | -1.18459 | 26.61951 | 0.965 | -53.3579 | 50.98869 |
|  |  |  |  |  |  |
| Fatalities (excluding unknown intent and police related) |  |  |  |  |  |
| time | 0.140905 | 0.183157 | 0.442 | -0.2180766 | 0.4998872 |
| treated | 4.680441 | 2.33916 | 0.045 | 0.0957717 | 9.26511 |
| DID | -0.49777 | 0.151316 | 0.001 | -0.79434 | -0.2011921 |
| bradycat | 1.808228 | 0.402181 | 0.000 | 1.019967 | 2.596489 |
| males | -102.954 | 98.26102 | 0.295 | -295.5419 | 89.63426 |
| hispanic | -4.95383 | 7.197782 | 0.491 | -19.06123 | 9.153559 |
| white | 6.758451 | 24.67047 | 0.784 | -41.59477 | 55.11168 |
| black | 0.194794 | 24.9674 | 0.994 | -48.7404 | 49.12999 |
|  |  |  |  |  |  |
| Fatalities  (excluding NY) |  |  |  |  |  |
| time | 0.165841 | 0.2014389 | 0.410 | -0.22897 | 0.560654 |
| treated | 2.639175 | 3.073534 | 0.391 | -3.38484 | 8.663192 |
| DID | -0.56828 | 0.185754 | 0.002 | -0.93235 | -0.20421 |
| bradycat | 1.60298 | 0.6083137 | 0.008 | 0.410707 | 2.795253 |
| males | -79.1404 | 100.4177 | 0.431 | -275.956 | 117.6748 |
| hispanic | -4.64242 | 8.609472 | 0.590 | -21.5167 | 12.23184 |
| white | -5.71942 | 30.04475 | 0.849 | -64.606 | 53.1672 |
| black | -9.40865 | 30.31134 | 0.756 | -68.8178 | 50.00048 |

bradycat: Brady category; DID: difference in difference interaction term; NY: New York

eTable3: Overall case fatality rates per 100,000 persons using crude and age-adjusted rates (including unknown intent and legal intervention)

| State | Pre-intervention | | Post-intervention | | % change | |
| --- | --- | --- | --- | --- | --- | --- |
| crude | age adjusted | crude | age adjusted | crude | age adjusted |
| Florida | 12.35 | 11.80 | 12.45 | 11.80 | +0.81% | +0.00% |
| Arizona | 14.15 | 14.09 | 14.14 | 13.86 | -0.07% | -1.63% |
| Oregon | 11.24 | 10.67 | 11.88 | 11.16 | +5.69% | +4.59% |
| Minnesota | 6.89 | 6.70 | 7.30 | 7.07 | +5.95% | +5.52% |
| Virginia | 10.75 | 10.48 | 10.46 | 10.13 | -2.70% | -3.34% |
| New York | 5.08 | 4.92 | 4.60 | 4.38 | -9.45% | -10.98% |
| Illinois | 8.38 | 8.27 | 8.99 | 8.85 | +7.28% | +7.01% |
| North Carolina | 11.86 | 11.67 | 12.21 | 11.86 | +2.95% | +1.63% |
| Michigan | 11.19 | 11.24 | 11.80 | 11.73 | +5.45% | +4.83% |
| Control Group:  Average Rate | 10.21 | 9.54* | 10.43 | 9.58* | +2.15% | +0.42% |
| Study Group:  California | 8.07 | 7.90 | 7.85 | 7.64 | -2.73% | -3.29% |

*The control group average age-adjusted rate is calculated by: average age-adjusted rate = [Sum Total(state population*state level age adjusted rate)]/[Sum Total(state population)].
